# Supplementary material
Source: MDPI journal article supplement (https://www.mdpi.com/1999-4907/15/3/431)
Supplement: s1 [file s1]

Supplemental Material:

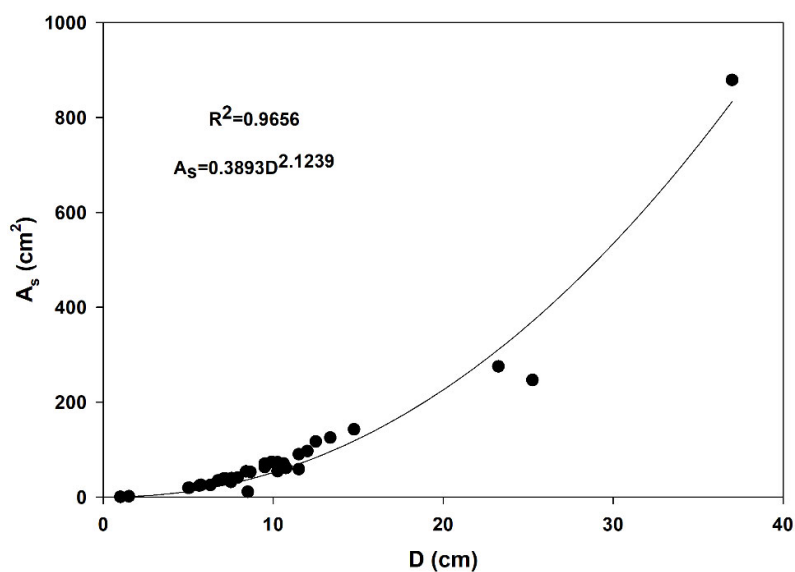

**Figure S1.** Non-linear relationship between the sapwood area and  $D$  developed from 41 sampled *Juniperus drupacea* individuals in Mt Parnon, SE Peloponnese, Greece ( $P < 0.0001$ ).

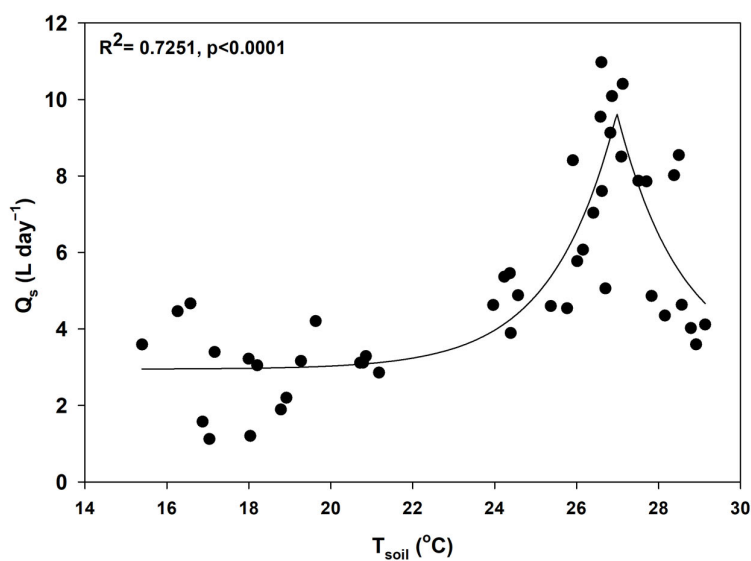

**Figure S2.**  $Q_s$  [ $\text{L day}^{-1}$ ] variation in relation to different mean soil temperatures ( $T_{\text{soil}}$ ) at 8 cm depth during the dry months of the study period (July to September 2021). Non-linear regression line was generated using a Gaussian Peak Modified 5 parameter equation.
